# Supplementary material
Source: PubMed Central journal article supplement (PMC7901713)
Supplement: NIHMS1667727-supplement-1.pdf [file NIHMS1667727-supplement-1.pdf]

## Supplementary Materials

| Edema severity                             | Regex keyword terms                | Number of reports | Accuracy |
|--------------------------------------------|------------------------------------|-------------------|----------|
| Overall                                    | N/A                                | 485               | 89.69%   |
| Level 0 –<br>none<br>(n=216)               | (no) pulmonary edema               | 222               | 88.74%   |
|                                            | (no) vascular congestion           | 43                | 100.00%  |
|                                            | (no) fluid overload                | 4                 | 100.00%  |
|                                            | (no) acute cardiopulmonary process | 115               | 98.27%   |
| Level 1 –<br>vascular congestion<br>(n=98) | cephalization                      | 17                | 94.12%   |
|                                            | pulmonary vascular congestion      | 96                | 98.96%   |
|                                            | hilar engorgement                  | 3                 | 100.00%  |
|                                            | vascular plethora                  | 13                | 100.00%  |
|                                            | pulmonary vascular prominence      | 1                 | 100.00%  |
| Level 2 –<br>interstitial edema<br>(n=105) | pulmonary vascular engorgement     | 8                 | 87.50%   |
|                                            | interstitial opacities             | 30                | 73.33%   |
|                                            | kerley                             | 13                | 100.00%  |
|                                            | interstitial edema                 | 92                | 94.57%   |
|                                            | interstitial thickening            | 6                 | 66.67%   |
|                                            | interstitial pulmonary edema       | 21                | 100.00%  |
|                                            | interstitial marking               | 19                | 68.42%   |
|                                            | interstitial abnormality           | 10                | 70.00%   |
| Level 3 –<br>alveolar edema<br>(n=66)      | interstitial abnormalities         | 2                 | 100.00%  |
|                                            | interstitial process               | 2                 | 100.00%  |
|                                            | alveolar infiltrates               | 10                | 100.00%  |
|                                            | severe pulmonary edema             | 58                | 98.28%   |
|                                            | perihilar infiltrates              | 1                 | 100.00%  |
|                                            | hilar infiltrates                  | 1                 | 100.00%  |
|                                            | parenchymal opacities              | 6                 | 16.67%   |
|                                            | alveolar opacities                 | 7                 | 100.00%  |
|                                            | ill defined opacities              | 1                 | 100.00%  |
| ill-defined opacities                      | 1                                  | 0.00%             |          |
| patchy opacities                           | 10                                 | 10.00%            |          |

Supplemental Table 1: Validation of regex keyword terms. The accuracy (positive predictive value) of the regular expression results for levels 0-3 based on the expert review results are 90.74%, 80.61%, 95.24%, and 90.91%, respectively. The total number of reports from all the keywords is more than 485 because some reports contain more than one keyword.

| Hyperparameter                | Setting                                  |
|-------------------------------|------------------------------------------|
| number-of-epochs (supervised) | 50, 100, 150, <b>250</b>                 |
| learning-rate                 | <b>2e 5</b> , 5e-4, 1e-4, 1e-3           |
| learning-rate-scheduler       | <b>warmup linear</b> , reduce-on-plateau |

Supplemental Table 2: Hyper-parameter search. Hyper-parameter settings were firstly experimented on the joint model in a supervised learning fashion. The experiments were performed on 5-fold cross validation within the training set, while holding out the test set. A learning rate of 2e-5 and the warmup-linear scheduler were chosen. Finally, the number of epochs was further experimented for the semi-supervised joint model learning with the 5-fold cross validation.

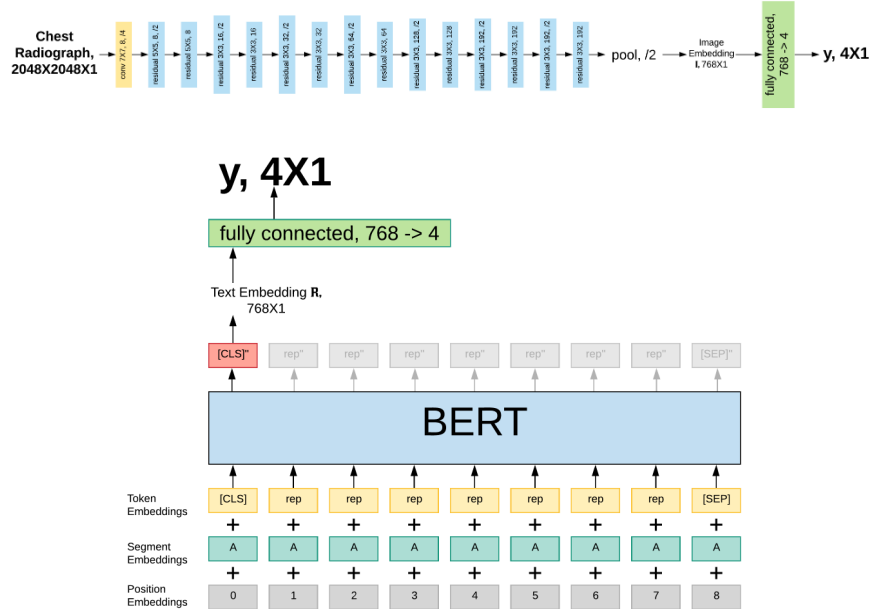

Supplemental Figure 1: Top: Image encoder and classifier architecture. Each residual block includes 2 convolutional layers. Bottom: Text encoder and classifier architecture using the BERT model. A full radiology report is encoded between [CLS] and [SEP] tokens; rep is the text associated with the report. Maximum input sequence length is set to 320.

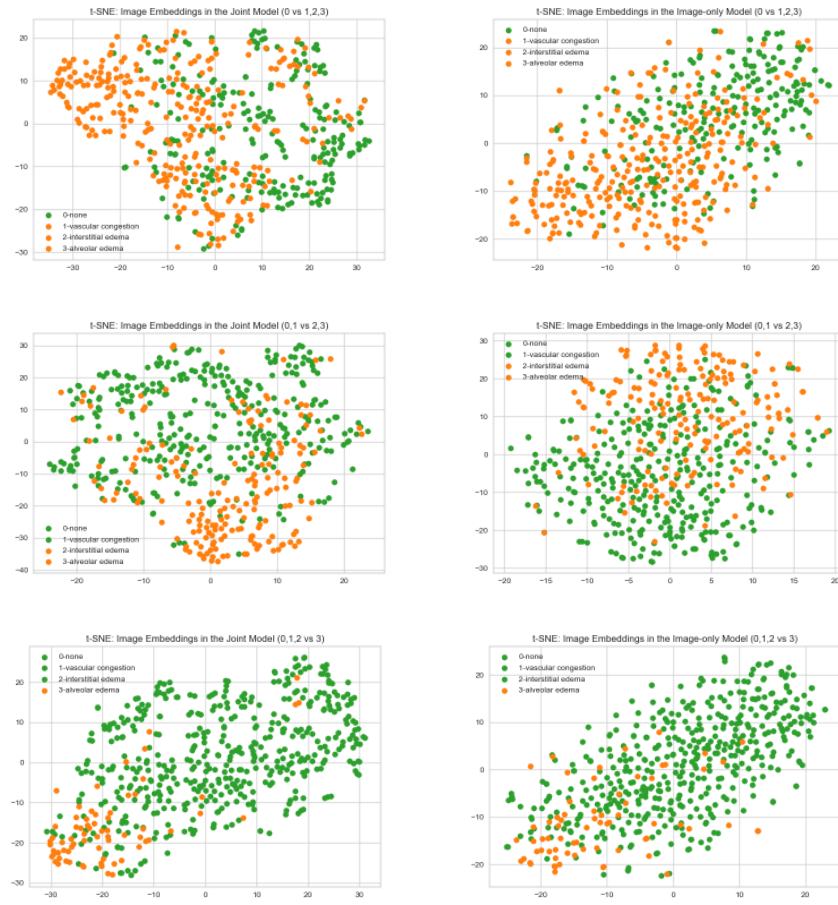

Supplemental Figure 2: t-SNE visualization in 2 dimensions for image embeddings in the joint model (left) and the embeddings in the image-only model (right).
